# Supplementary material for: A zwitterionic zirconium complex that catalyzes hydroamination of aminoalkenes at room temperature
Source: Royal Society of Chemistry journal article supplement (doi:10.1039/b918989k), 2009-11-23
Supplement: b918989k.pdf [file b918989k.pdf]

## A zwitterionic zirconium complex that catalyzes hydroamination of aminoalkenes at room temperature

Kuntal Manna, Arkady Ellern, and Aaron D. Sadow\*

### Experiment details.

**General Procedures.** All reactions were performed under a dry argon atmosphere using standard Schlenk techniques or under a nitrogen atmosphere in a glovebox unless otherwise indicated. Dry, oxygen-free solvents were used throughout. Benzene, toluene, pentane, and tetrahydrofuran were degassed by sparging with nitrogen, filtered through activated alumina columns, and stored under N<sub>2</sub>. Benzene-*d*<sub>6</sub> and toluene-*d*<sub>8</sub> were vacuum transferred from Na/K alloy and stored under N<sub>2</sub> in the glovebox. Zr(NMe<sub>2</sub>)<sub>4</sub>,<sup>1</sup> Hf(NMe<sub>2</sub>)<sub>4</sub>,<sup>2</sup> tetrakis(trimethylsilyl)silane,<sup>3</sup> and sodium cyclopentadienide,<sup>4</sup> 2,2-diphenyl-4-penten-1-amine (**5**),<sup>5</sup> 2,2-dimethyl-4-penten-1-amine (**6**),<sup>6</sup> 4-penten-1-amine (**7**),<sup>7</sup> (1-allylcyclohexyl)methylamine (**8**),<sup>6</sup> 1-(3-butenyl-cyclohexyl)methylamine (**9**),<sup>6</sup> and N-methyl-2,2-diphenyl-4-penten-1-amine (**10**)<sup>8</sup> were prepared by published procedures. Cyclooctane was purchased from Aldrich. Cyclooctane and all the aminoalkenes were degassed and stored with 4 Å molecular sieve in glovebox prior to use. <sup>1</sup>H and <sup>13</sup>C{<sup>1</sup>H} NMR spectra were collected on a Bruker DRX-400 spectrometer. <sup>15</sup>N chemical shifts were determined by <sup>1</sup>H-<sup>15</sup>N HMBC experiments on a Bruker Avance II 700 spectrometer with a Bruker Z-gradient inverse TXI <sup>1</sup>H/<sup>13</sup>C/<sup>15</sup>N 5mm cryoprobe; <sup>15</sup>N chemical shifts were originally referenced to liquid NH<sub>3</sub> and recalculated to the CH<sub>3</sub>NO<sub>2</sub> chemical shift scale by adding -381.9 ppm. <sup>11</sup>B NMR spectra were referenced to an external sample of BF<sub>3</sub>·Et<sub>2</sub>O. Elemental analysis was performed using a Perkin-Elmer 2400 Series II CHN/S by the Iowa State Chemical Instrumentation Facility.

**H[PhB(C<sub>5</sub>H<sub>5</sub>)(Ox<sup>Me2</sup>)<sub>2</sub>] (H[1]).** A Schlenk flask was charged with PhB(Ox<sup>Me2</sup>)<sub>2</sub> (3.00 g, 10.5 mmol) and NaCp (0.581 g, 6.59 mmol) in the glovebox. The flask was attached to a Schlenk manifold, and THF (150 mL) was added via cannula addition to form a yellow solution. The flask was sealed and the resulting solution was stirred overnight. The solution was filtered to remove a precipitate that appeared overnight, and then the solvent was removed under reduced pressure to afford a brownish yellow solid. This crude product was purified by silica gel column chromatography (Hexane:EtOAc:Et<sub>3</sub>N = 12:7:1; R<sub>f</sub> = 0.50) to afford 3.13 g of H[PhB(C<sub>5</sub>H<sub>5</sub>)(Ox<sup>Me2</sup>)<sub>2</sub>] (4.95 mmol, 47.1%) as a mixture of three isomers. The light yellow solid was dissolved in benzene and stirred over P<sub>2</sub>O<sub>5</sub> to dry without any reduction in yield. <sup>1</sup>H NMR (acetonitrile-*d*<sub>3</sub>, 400 MHz): δ 7.14-7.04 (m, 5 H, C<sub>6</sub>H<sub>5</sub>), 6.61-6.16 (m, 3 H, C<sub>5</sub>H<sub>5</sub>-*sp*<sup>2</sup>), 4.09-4.00 (m, 4 H,  $\overline{\text{CNCMe}_2\text{CH}_2\text{O}}$ ), 2.90-2.88 (m, 2 H, C<sub>5</sub>H<sub>5</sub>-*sp*<sup>3</sup>), 1.35-1.34 (m, 12 H,  $\overline{\text{CNCMe}_2\text{CH}_2\text{O}}$ ).

$^{13}\text{C}\{^1\text{H}\}$  NMR (acetonitrile- $d_3$ , 150 MHz):  $\delta$  190.50 ( $\overline{\text{CNCMe}_2\text{CH}_2\text{O}}$ ), 158.8 (br, *ipso*- $\text{C}_5\text{H}_5$ ), 141.90 ( $\text{C}_5\text{H}_5\text{-}sp^2$ ), 140.85 ( $\text{C}_5\text{H}_5\text{-}sp^2$ ), 134.96 ( $\text{C}_5\text{H}_5\text{-}sp^2$ ), 134.74 ( $\text{C}_5\text{H}_5\text{-}sp^2$ ), 134.65 (*ortho*- $\text{C}_6\text{H}_5$ ), 134.37 ( $\text{C}_5\text{H}_5\text{-}sp^2$ ), 134.30 ( $\text{C}_5\text{H}_5\text{-}sp^2$ ), 131.81 ( $\text{C}_5\text{H}_5\text{-}sp^2$ ), 129.71 ( $\text{C}_5\text{H}_5\text{-}sp^2$ ), 128.51 ( $\text{C}_5\text{H}_5\text{-}sp^2$ ), 128.34 (*meta*- $\text{C}_6\text{H}_5$ ), 126.48 ( $\text{C}_5\text{H}_5\text{-}sp^2$ ), 126.24 (*para*- $\text{C}_6\text{H}_5$ ), 81.31 ( $\overline{\text{CNCMe}_2\text{CH}_2\text{O}}$ ), 64.71 ( $\overline{\text{CNCMe}_2\text{CH}_2\text{O}}$ ), 64.68 ( $\overline{\text{CNCMe}_2\text{CH}_2\text{O}}$ ), 47.45 ( $\text{C}_5\text{H}_5\text{-}sp^3$ ), 43.48 ( $\text{C}_5\text{H}_5\text{-}sp^3$ ), 28.47 ( $\overline{\text{CNCMe}_2\text{CH}_2\text{O}}$ ), 28.35 ( $\overline{\text{CNCMe}_2\text{CH}_2\text{O}}$ ).  $^{11}\text{B}$  NMR (acetonitrile- $d_3$ , 128 MHz):  $\delta$  -15.27, -15.63, -15.99.  $^{15}\text{N}\{^1\text{H}\}$  NMR (benzene- $d_6$ , 71 MHz):  $\delta$  -172 ( $\overline{\text{CNCMe}_2\text{CH}_2\text{O}}$ ). IR (KBr,  $\text{cm}^{-1}$ ): 3080 w, 3056 w, 3028 w, 2969 m, 2929 w, 2887 w, 1589 s (C=N), 1461 s, 1429 s, 1416 s, 1383 m, 1365 m, 1345 w, 1318 s, 1265 m, 1195 s, 1138 w, 1090 w, 1064 w, 1022 w, 965 s, 934 s, 891 s. Anal. Calcd for  $\text{C}_{21}\text{H}_{27}\text{BO}_2\text{N}_2$ : C, 72.01; H, 7.77; N, 8.00. Found: C, 71.99; H, 7.99; N, 7.84. mp 152-154 °C.

**{PhB( $\eta^5\text{-C}_5\text{H}_4$ )(Ox $^{\text{Me}_2}$ ) $_2$ }Zr(NMe $_2$ ) $_2$  (2).** In the glovebox, H[PhB( $\text{C}_5\text{H}_5$ )(Ox $^{\text{Me}_2}$ ) $_2$ ] (0.250 g, 0.714 mmol) and Zr(NMe $_2$ ) $_4$  (0.193 g, 0.721 mmol) were placed in a 100 mL Schlenk roundbottom flask. The solids were dissolved in benzene (50 mL), and the solution was stirred for 2 h. All volatile materials were removed under reduced pressure to afford a light yellow oil, which was washed with pentane to obtain a light yellow powder of {PhB( $\eta^5\text{-C}_5\text{H}_4$ )(Ox $^{\text{Me}_2}$ ) $_2$ }Zr(NMe $_2$ ) $_2$  (0.367 g, 0.696 mmol, 97.6 %).  $^1\text{H}$  NMR (benzene- $d_6$ , 400 MHz):  $\delta$  8.21 (d,  $^3J = 7$  Hz, 2 H, *ortho*- $\text{C}_6\text{H}_5$ ), 7.52 (t,  $^3J = 7$  Hz, 2 H, *meta*- $\text{C}_6\text{H}_5$ ), 7.32 (t,  $^3J = 7$  Hz, 1 H, *para*- $\text{C}_6\text{H}_5$ ), 6.52 (m, 2 H, Cp), 6.15 (m, 2 H, Cp), 3.64 (d, 2 H,  $^2J = 8.0$  Hz,  $\overline{\text{CNCMe}_2\text{CH}_2\text{O}}$ ), 3.56 (d, 2 H,  $^2J = 8.0$  Hz,  $\overline{\text{CNCMe}_2\text{CH}_2\text{O}}$ ), 2.69 (s, 12 H, NMe $_2$ ), 1.11 (s, 6 H,  $\overline{\text{CNCMe}_2\text{CH}_2\text{O}}$ ), 1.01 (s, 6 H,  $\overline{\text{CNCMe}_2\text{CH}_2\text{O}}$ ).  $^{13}\text{C}\{^1\text{H}\}$  NMR (benzene- $d_6$ , 100 MHz):  $\delta$  194.65 ( $\overline{\text{CNCMe}_2\text{CH}_2\text{O}}$ ), 151.5 (br, *ipso*- $\text{C}_6\text{H}_5$ ), 143.01 (*ipso*- $\text{C}_5\text{H}_4$ ), 135.11 (*ortho*- $\text{C}_6\text{H}_5$ ), 127.67 (*meta*- $\text{C}_6\text{H}_5$ ), 125.47 (*para*- $\text{C}_6\text{H}_5$ ), 122.61 ( $\text{C}_5\text{H}_4$ ), 113.66 ( $\text{C}_5\text{H}_4$ ), 78.91 ( $\overline{\text{CNCMe}_2\text{CH}_2\text{O}}$ ), 67.16 ( $\overline{\text{CNCMe}_2\text{CH}_2\text{O}}$ ), 43.94 (NMe $_2$ ), 28.91 ( $\overline{\text{CNCMe}_2\text{CH}_2\text{O}}$ ), 28.50 ( $\overline{\text{CNCMe}_2\text{CH}_2\text{O}}$ ).  $^{15}\text{N}\{^1\text{H}\}$  NMR (benzene- $d_6$ , 71 MHz):  $\delta$  -135.4 ( $\overline{\text{CNCMe}_2\text{CH}_2\text{O}}$ ); Zr(NMe $_2$ ) $_2$  was not detected.  $^{11}\text{B}$  NMR (benzene- $d_6$ , 128 MHz):  $\delta$  -14.51. IR (KBr,  $\text{cm}^{-1}$ ): 3064 w, 3040 w, 2962 s, 2927 s, 2863 s, 2819 s, 2771 s, 1595 s (C=N), 1491 s, 1461 s, 1444 w, 1429 m, 1369 m, 1360 m, 1283 s, 1249 s, 1195 s, 1165 s, 1139 s, 1118 s, 1050 s, 1037 w, 989 w, 963 s, 942 s, 927 s, 886 w, 871 w, 837 m, 815 m, 796 m, 783 w, 732 s, 705 s, 688 s. Anal. Calcd for  $\text{C}_{25}\text{H}_{37}\text{BO}_2\text{N}_4$  Zr: C, 56.91; H, 7.07; N, 10.62. Found: C, 57.26; H, 6.99; N, 9.87. m.p. 107-110 °C, dec.

**{PhBC $_5\text{H}_4$ (Ox $^{\text{Me}_2}$ ) $_2$ }Hf(NMe $_2$ ) $_2$  (3).** A procedure analogous to that described for {PhBC $_5\text{H}_4$ (Ox $^{\text{Me}_2}$ ) $_2$ }Zr(NMe $_2$ ) $_2$ , using H[PhB( $\text{C}_5\text{H}_5$ )(Ox $^{\text{Me}_2}$ ) $_2$ ] (0.250 g, 0.714 mmol) and Hf(NMe $_2$ ) $_4$  (0.256 g, 0.721 mmol), provides {PhBC $_5\text{H}_4$ (Ox $^{\text{Me}_2}$ ) $_2$ }Hf(NMe $_2$ ) $_2$  as a light orange solid. Yield: 0.430 g (0.699 mmol, 97.9 %).  $^1\text{H}$  NMR (benzene- $d_6$ , 400 MHz):  $\delta$  8.21 (d,  $^3J = 7$

Hz, 2 H, *ortho*-C<sub>6</sub>H<sub>5</sub>), 7.52 (t, <sup>3</sup>J = 7 Hz, 2 H, *meta*-C<sub>6</sub>H<sub>5</sub>), 7.32 (t, <sup>3</sup>J = 7 Hz, 1 H, *para*-C<sub>6</sub>H<sub>5</sub>), 6.46 (m, 2 H, C<sub>5</sub>H<sub>4</sub>), 6.12 (m, 2 H, C<sub>5</sub>H<sub>4</sub>), 3.65 (d, 2 H, <sup>2</sup>J = 8.0 Hz,  $\overline{\text{CNCMe}_2\text{CH}_2\text{O}}$ ), 3.57 (d, 2 H, <sup>2</sup>J = 8.0 Hz,  $\overline{\text{CNCMe}_2\text{CH}_2\text{O}}$ ), 2.74 (s, 12 H, NMe<sub>2</sub>), 1.12 (s, 6 H,  $\overline{\text{CNCMe}_2\text{CH}_2\text{O}}$ ), 1.00 (s, 6 H,  $\overline{\text{CNCMe}_2\text{CH}_2\text{O}}$ ). <sup>13</sup>C{<sup>1</sup>H} NMR (benzene-*d*<sub>6</sub>, 400 MHz): δ 198.36 ( $\overline{\text{CNCMe}_2\text{CH}_2\text{O}}$ ), 150.75 (*ipso*-C<sub>6</sub>H<sub>5</sub>), 140.61 (*ipso*-C<sub>5</sub>H<sub>4</sub>), 134.79 (*ortho*-C<sub>6</sub>H<sub>5</sub>), 127.46 (*meta*-C<sub>6</sub>H<sub>5</sub>), 125.22 (*para*-C<sub>6</sub>H<sub>5</sub>), 120.88 (C<sub>5</sub>H<sub>4</sub>), 112.49 (C<sub>5</sub>H<sub>4</sub>), 78.91 ( $\overline{\text{CNCMe}_2\text{CH}_2\text{O}}$ ), 67.07 ( $\overline{\text{CNCMe}_2\text{CH}_2\text{O}}$ ), 43.77 (s, NMe<sub>2</sub>), 28.51 ( $\overline{\text{CNCMe}_2\text{CH}_2\text{O}}$ ), 27.90 ( $\overline{\text{CNCMe}_2\text{CH}_2\text{O}}$ ). <sup>15</sup>N{<sup>1</sup>H} NMR (benzene-*d*<sub>6</sub>, 71 MHz): δ -132.3 ( $\overline{\text{CNCMe}_2\text{CH}_2\text{O}}$ ). <sup>11</sup>B NMR (benzene-*d*<sub>6</sub>, 128 MHz): δ -14.6. IR (KBr, cm<sup>-1</sup>): 3064 w, 3042 w, 3012 w, 2962 s, 2928 m, 2868 s, 2853 s, 2821 s, 2773 s, 1595 m (C=N), 1549 w, 1483 s, 1462 s, 1446 m, 1429 m, 1370 m, 1361 m, 1287 s, 1251 s, 1203 s, 1195 s, 1183 s, 1166 m, 1138 m, 1051 m, 1037 w, 963 s, 936 s, 908 w. Anal. Calcd for C<sub>25</sub>H<sub>37</sub>BO<sub>2</sub>N<sub>4</sub>Hf(C<sub>6</sub>H<sub>6</sub>)<sub>0.5</sub>: C, 51.43; H, 6.17; N, 8.57. Found: C, 51.17; H, 6.20; N, 8.40. Mp: 90-95 °C, dec.

**{PhB(η<sup>5</sup>-C<sub>5</sub>H<sub>4</sub>)(Ox<sup>Me2</sup>)<sub>2</sub>}Zr(NMe<sub>2</sub>)<sub>2</sub>THF (4)**. Slow diffusion of pentane into a THF solution of **2** at -30 °C provided analytically pure, X-ray quality crystals of {PhB(η<sup>5</sup>-C<sub>5</sub>H<sub>4</sub>)(Ox<sup>Me2</sup>)<sub>2</sub>}Zr(NMe<sub>2</sub>)<sub>2</sub>THF (**4**). The room temperature NMR spectroscopic data for **4** is identical to that of the THF-free species in addition to resonances due to uncoordinated THF. The structural difference is observed in the IR and in the analytical data. IR (KBr, cm<sup>-1</sup>): 3063 w, 3042 m, 2995 m, 2966 s, 2930s, 2862 s, 2819 s, 2768 s, 1610 s (CN), 1533 s (CN), 1488 m, 1461 m, 1429 m, 1367 w, 1356 w, 1281 s, 1243 s, 1196 s, 1180 s, 1149 m, 1135 m, 1059 s, 1048 s, 1035 m, 1021 m, 991 s, 964 s, 950 s, 937 s, 873 s, 863 s, 817 s, 799 s, 774 w, 732 s, 704 s. Anal. Calcd for C<sub>29</sub>H<sub>45</sub>BO<sub>3</sub>N<sub>4</sub>Zr: C, 58.08; H, 7.56; N, 9.34. Found: C, 57.88; H, 7.51; N, 9.10.

### Hydroamination Catalysis.

a) In a typical small-scale hydroamination experiment, a J. Young style NMR tube with a re-sealable with Teflon valve was charged with 100 μmol of aminoalkene substrate, 10 μmol of catalyst, and 0.5 mL of solvent (benzene-*d*<sub>6</sub>). The vessel was sealed, and the reaction progress was monitored by <sup>1</sup>H NMR spectroscopy at regular intervals to determine the optimum conversion.

b) In a typical scaled up hydroamination experiment, a Schlenk flask equipped with a magnetic stir bar was charged with the catalyst {PhB(η<sup>5</sup>-C<sub>5</sub>H<sub>4</sub>)(Ox<sup>Me2</sup>)<sub>2</sub>}Zr(NMe<sub>2</sub>)<sub>2</sub> (**2**) (10 mol%) and a benzene solution (30 mL) of the aminoalkene (1.00 g). The flask was sealed, and the reaction mixture was stirred for 15 h at room temperature. Then, the solution was concentrated under reduced pressure and subjected to silica gel column chromatography (CH<sub>2</sub>Cl<sub>2</sub>:MeOH = 9.5:0.5) to provide purified pyrrolidine or piperidine.

**Kinetic measurements.** All the kinetics measurements were conducted by monitoring the reactions with  $^1\text{H}$  NMR spectroscopy using a Bruker DRX400 spectrometer. The conversion of 2,2-diphenyl-1-penten-1-amine to 2-methyl-4,4-diphenylpyrrolidine, and 2,2-dimethyl-1-penten-1-amine to 2-methyl-4,4-dimethylpyrrolidine was monitored at regular intervals with single scan acquisition of  $^1\text{H}$  NMR spectra. The substrate concentration was determined by integration of appropriate resonances and comparison to integration of a cyclooctane or tetrakis(trimethylsilyl)silane internal standard of accurately known concentration.

**Representative example:** Catalytic conversion of 2,2-diphenyl-1-penten-1-amine into 2-methyl-4,4-diphenylpyrrolidine using 10 mol %  $\{\text{PhB}(\eta^5\text{-C}_5\text{H}_4)(\text{Ox}^{\text{Me}_2})_2\}\text{Zr}(\text{NMe}_2)_2$  (**2**) as a catalyst is described. A 5 mL stock solution containing a known concentration of 2,2-diphenyl-1-penten-1-amine (0.237 g, 0.999 mmol, 0.20 M in benzene- $d_6$ ) and the appropriate internal standard cyclooctane (0.008 g, 0.071 mmol, 0.014 M) was prepared using a 5 mL volumetric flask. The stock solution (0.5 mL) was added by a 1 mL glass syringe to a known amount of catalyst **2** (0.005 g, 0.010 mmol) in a glass vial. The resultant solution was quickly transferred to a J-Young style re-sealable NMR tube. The NMR tube was immediately placed in the NMR probe, which was preset at 296 K. Single scan spectra were acquired automatically at preset time intervals. The concentration of substrate and product at any given time were determined by integration of substrate and product resonances relative to the integration of the internal standard. These values of substrate concentrations (M) at different times (s) were plotted for the determination of the order of the substrate.

**Verification of first order substrate dependence using initial rates (Differential method).**

Because plots of  $\ln[\text{substrate}]$  versus time were complicated by severe product inhibition, the method of initial rates (a.k.a. the differential method) was used to verify first order dependence on substrate concentration. The initial rates for the hydroamination of 2,2-diphenyl-1-penten-1-amine were measured for several substrate concentrations. Linear regression fits for  $[\text{substrate}]$  versus time for the first 3000 s of the reaction provided the initial rate ( $d[\text{substrate}]/dt$ ) for a particular initial substrate concentration (Figure S3). Catalyst concentration was kept constant for these experiments.

Plots of  $\ln(d[2,2\text{-phenyl-1-penten-1-amine}]/dt)$  vs.  $\ln[2,2\text{-phenyl-1-penten-1-amine}]$  provides the value of the slope 0.94 (Figure S4). According to the rate equation:  $\ln[\text{rate}] = \ln k + n \ln[\text{substrate}]$ , the order of the substrate 2,2-phenyl-1-penten-1-amine is 0.94, which is consistent with the first order dependence of substrate.

**Isotope effect determination.**  $k_{\text{H}}$  and  $k_{\text{D}}$  were measured from the slope of the curves obtained from plotting  $k_{\text{obs(H)}}$  vs  $[\text{catalyst}]$  and  $k_{\text{obs(D)}}$  vs  $[\text{catalyst}]$  for cyclization reactions of 2,2-diphenyl-

1-penten-1-amine. The ratio of the two slopes (Figure S5) provided the value of the isotope effect ( $k_H/k_D=5.4$ ).

References:

1. G. M. Diamond, R. F. Jordan and J. L. Petersen, *J. Am. Chem. Soc.*, 1996, **118**, 8024.
2. G. M. Diamond, R. F. Jordan and J. L. Petersen, *Organometallics*, 1996, **15**, 4030.
3. G. Gutekunst and A. G. Brook, *J. Organomet. Chem.*, 1982, **225**, 1.
4. T. K. Panda, M. T. Gamer and P. W. Roesky, *Organometallics*, 2003, **22**, 877.
5. S. Hong, S. Tian, M. V. Metz and T. J. Marks, *J. Am. Chem. Soc.*, 2003, **125**, 14768.
6. C. F. Bender and R. A. Widenhoefer, *J. Am. Chem. Soc.*, 2005, **127**, 1070.
7. M. R. Gagne, C. L. Stern and T. J. Marks, *J. Am. Chem. Soc.*, 1992, **114**, 275.
8. B. D. Stubbert and T. J. Marks, *J. Am. Chem. Soc.*, 2007, **129**, 4253.

**Figure S1.** Plot of  $\ln[\text{substrate}]$  vs. time, illustrating first-order dependence on [2,2-diphenyl-1-penten-1-amine] for catalyst  $[\{\text{PhB}(\eta^5\text{-C}_5\text{H}_4)(\text{Ox}^{\text{Me}_2})_2\}\text{Zr}(\text{NMe}_2)_2]$  [2] concentrations from 0.0068 – 0.0398 M.

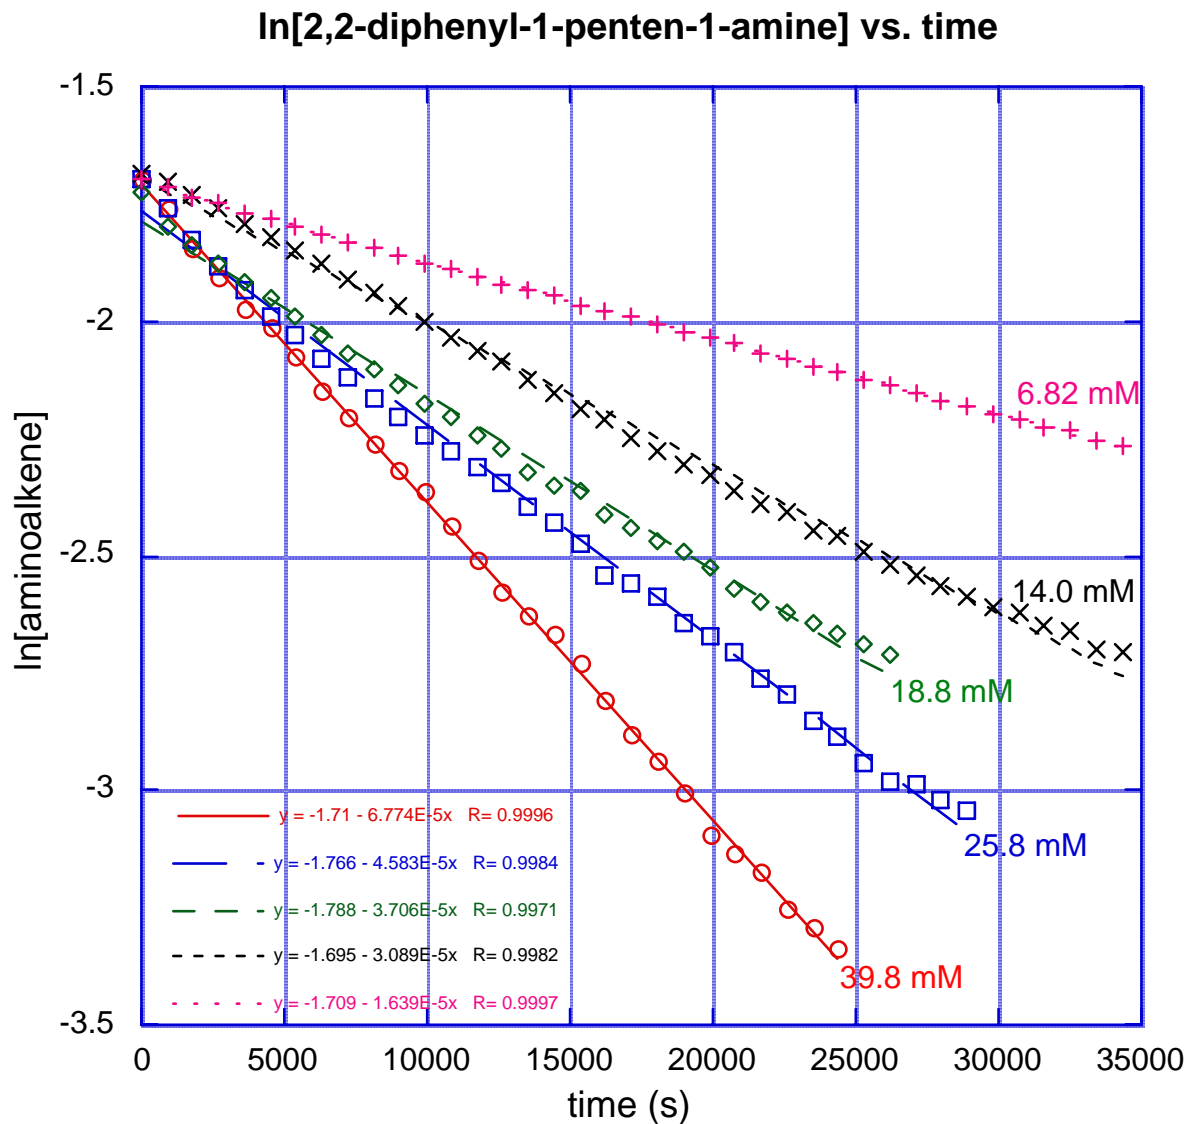

**Figure S2.** Plot of  $k_{\text{obs}}$  (from Figure S1) versus concentration of  $[(\text{PhB}(\eta^5\text{-C}_5\text{H}_4)(\text{Ox}^{\text{Me}_2})_2)\text{Zr}(\text{NMe}_2)_2]$  (**2**) for the cyclization of 2,2-diphenyl-1-penten-1-amine showing first order dependence on catalyst.

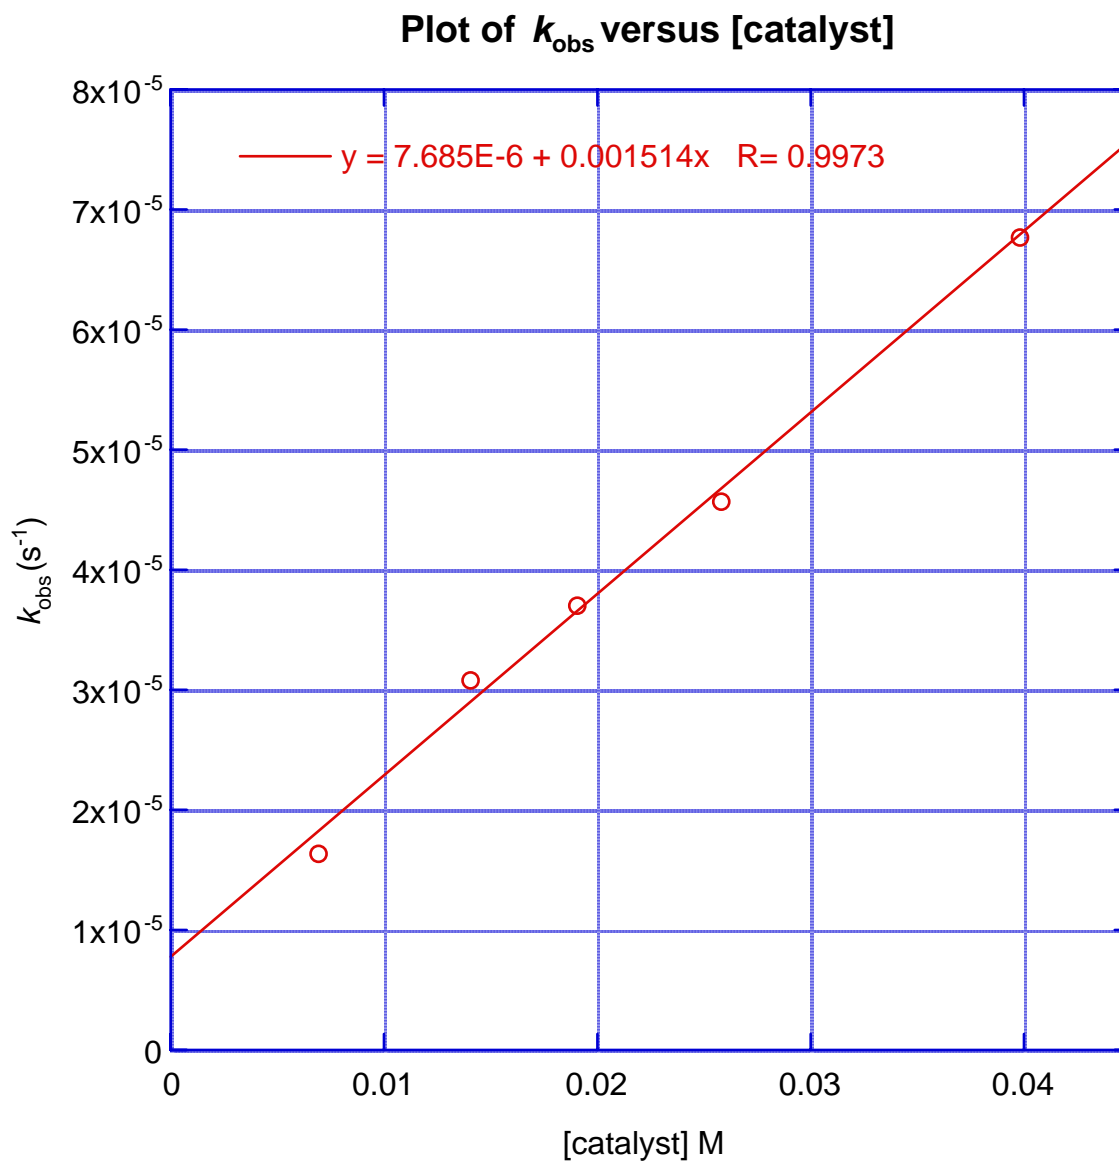

**Figure S3.** Initial rates for cyclization of 2,2-diphenyl-1-penten-1-amine catalyzed by **2**. The concentration of catalyst [**2**] is 0.0144 M.

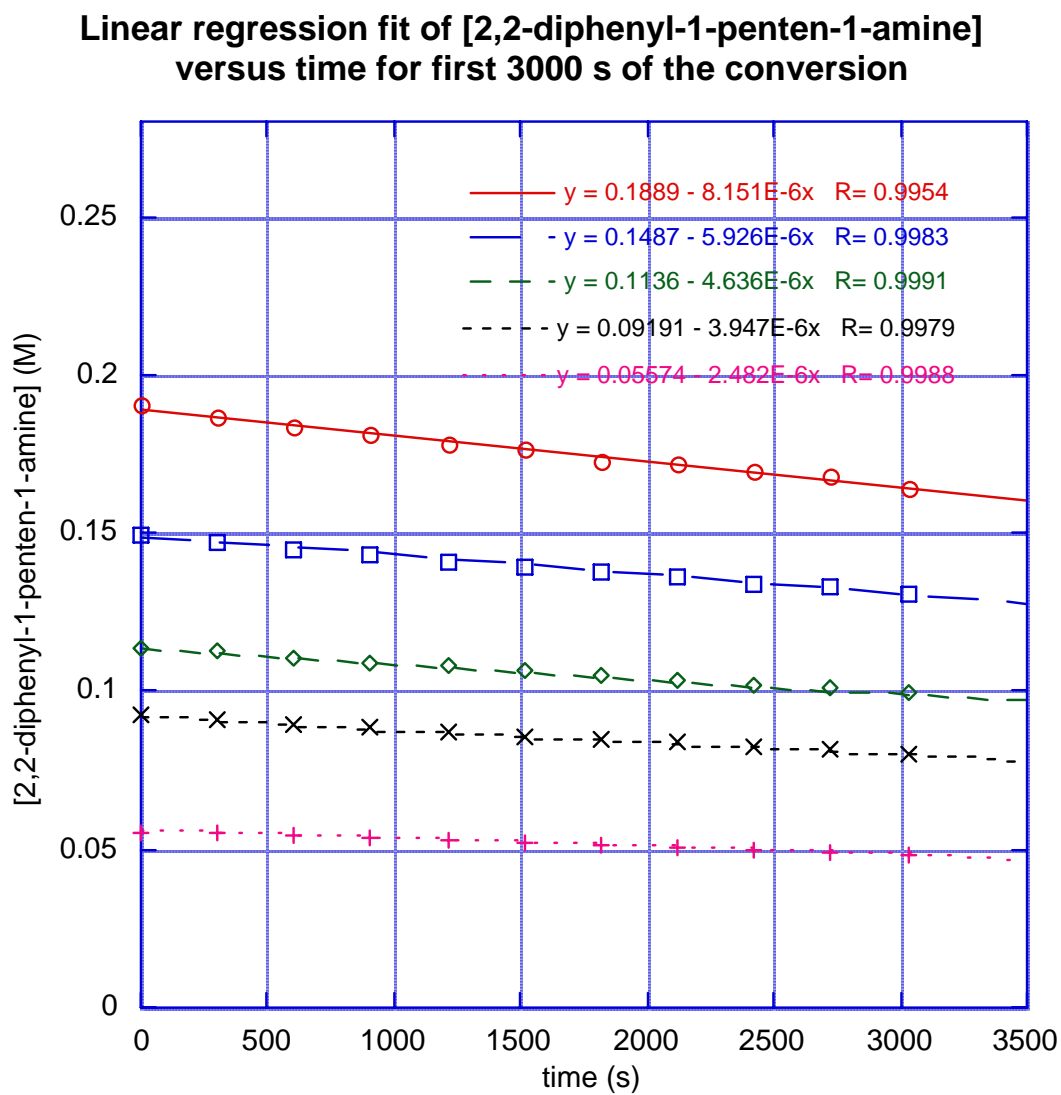



**Figure S4.** Plot of  $\ln(d[\text{substrate}]/dt)$  versus  $\ln[\text{substrate}]_{\text{ave}}$  using initial rates shown in Figure S3.  $[\text{substrate}]_{\text{ave}}$  is the average substrate concentration over 3000 s. A slope of 0.94 indicates first order [2,2-diphenyl-1-penten-1-amine] dependence.

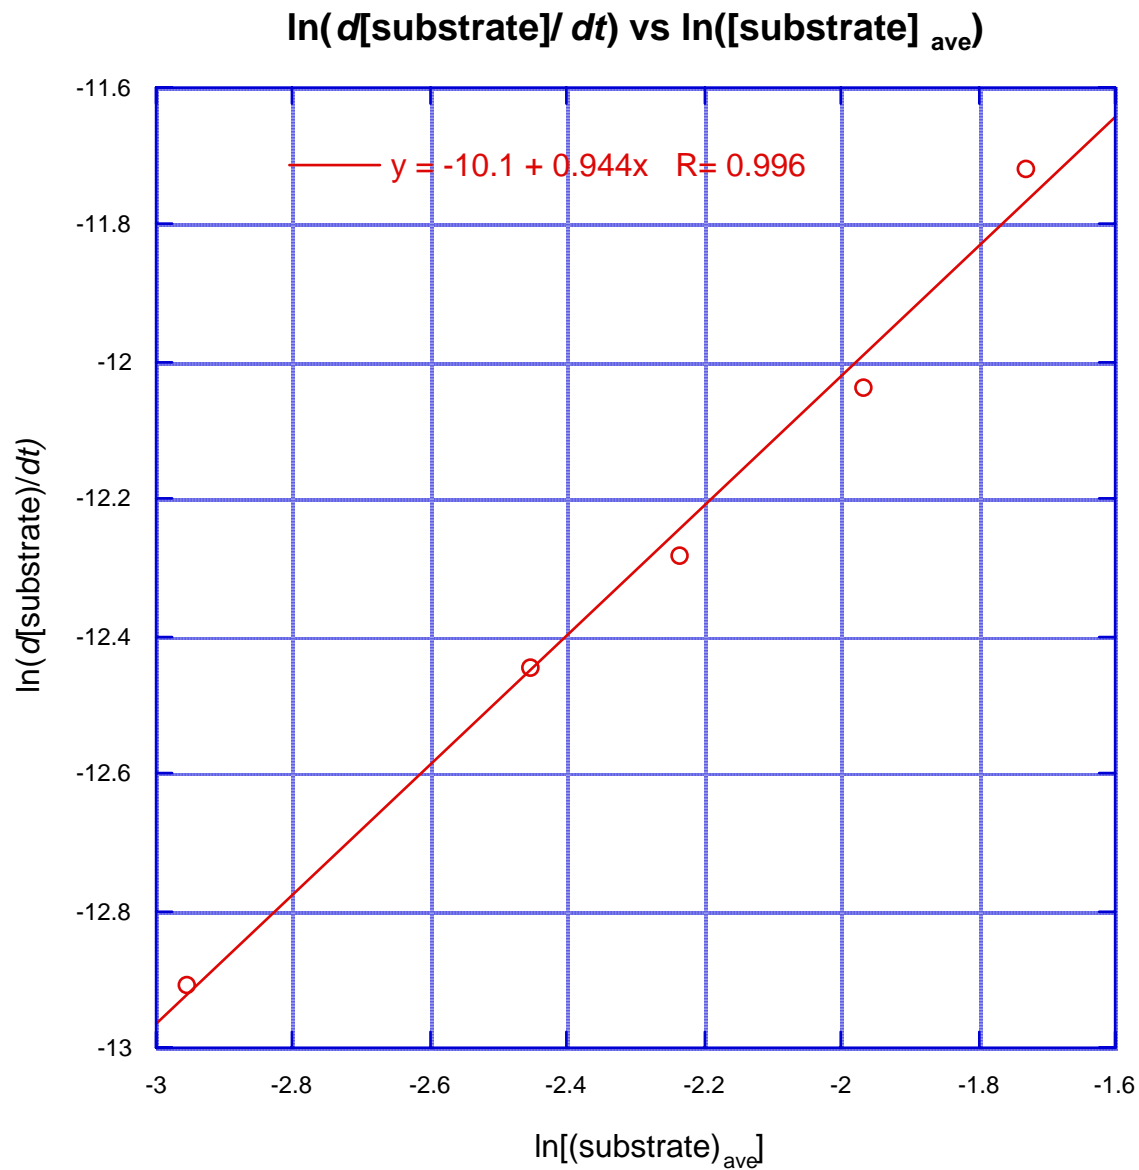

Figure S5. Primary isotope effect determination.

**Kinetic Isotope Effect ( $k_H/k_D$ ): plots of  $k_{obs}$  versus catalyst concentration for 2,2-diphenyl-1-pentene-amine and 2,2-diphenyl-1-pentene-amine-( $N-d_2$ )**

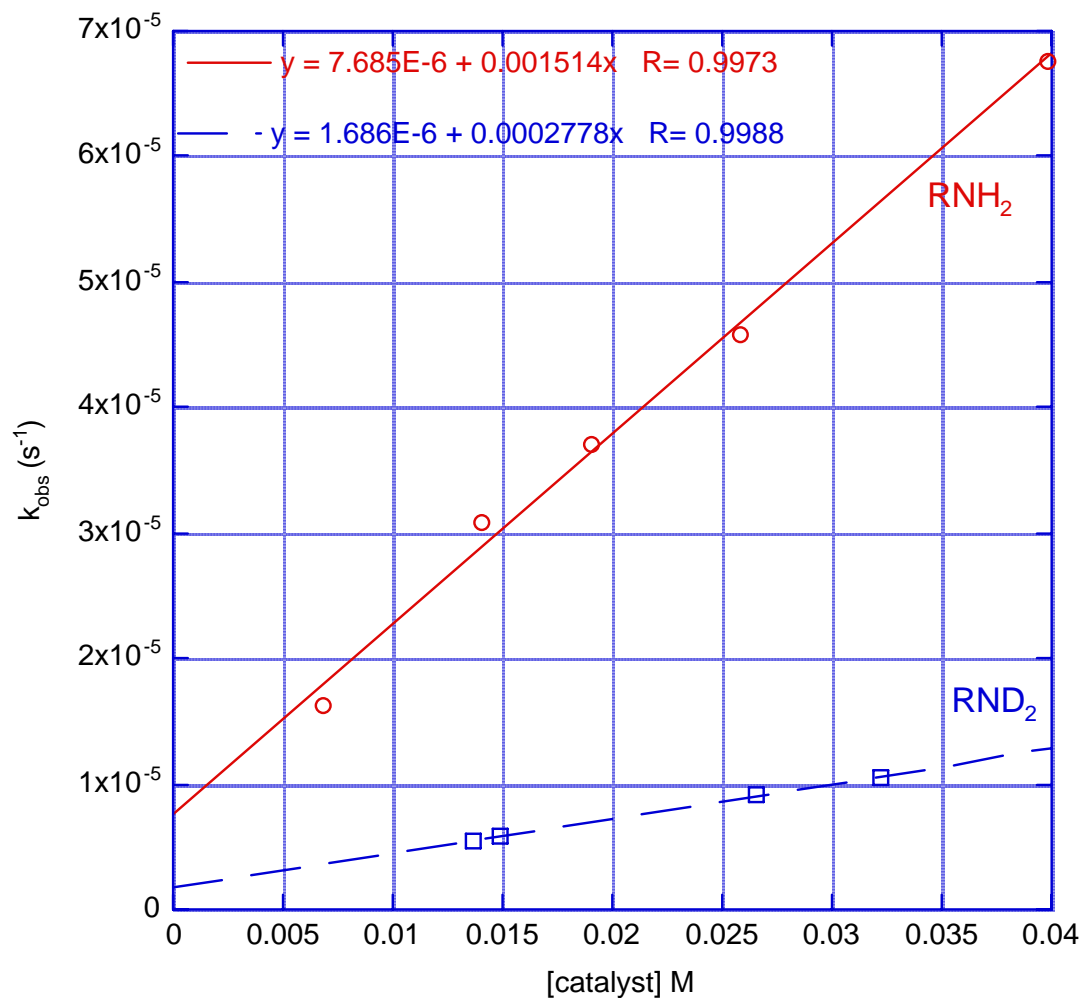

**Figure S6.** Plot of  $\ln[\text{substrate}]$  vs. time, illustrating first-order dependence on [2,2-dimethyl-1-penten-1-amine] for catalyst  $[\{\text{PhB}(\eta^5\text{-C}_5\text{H}_4)(\text{Ox}^{\text{Me}_2})_2\}\text{Zr}(\text{NMe}_2)_2]$  [2] concentrations from 0.0088 – 0.0157 M.

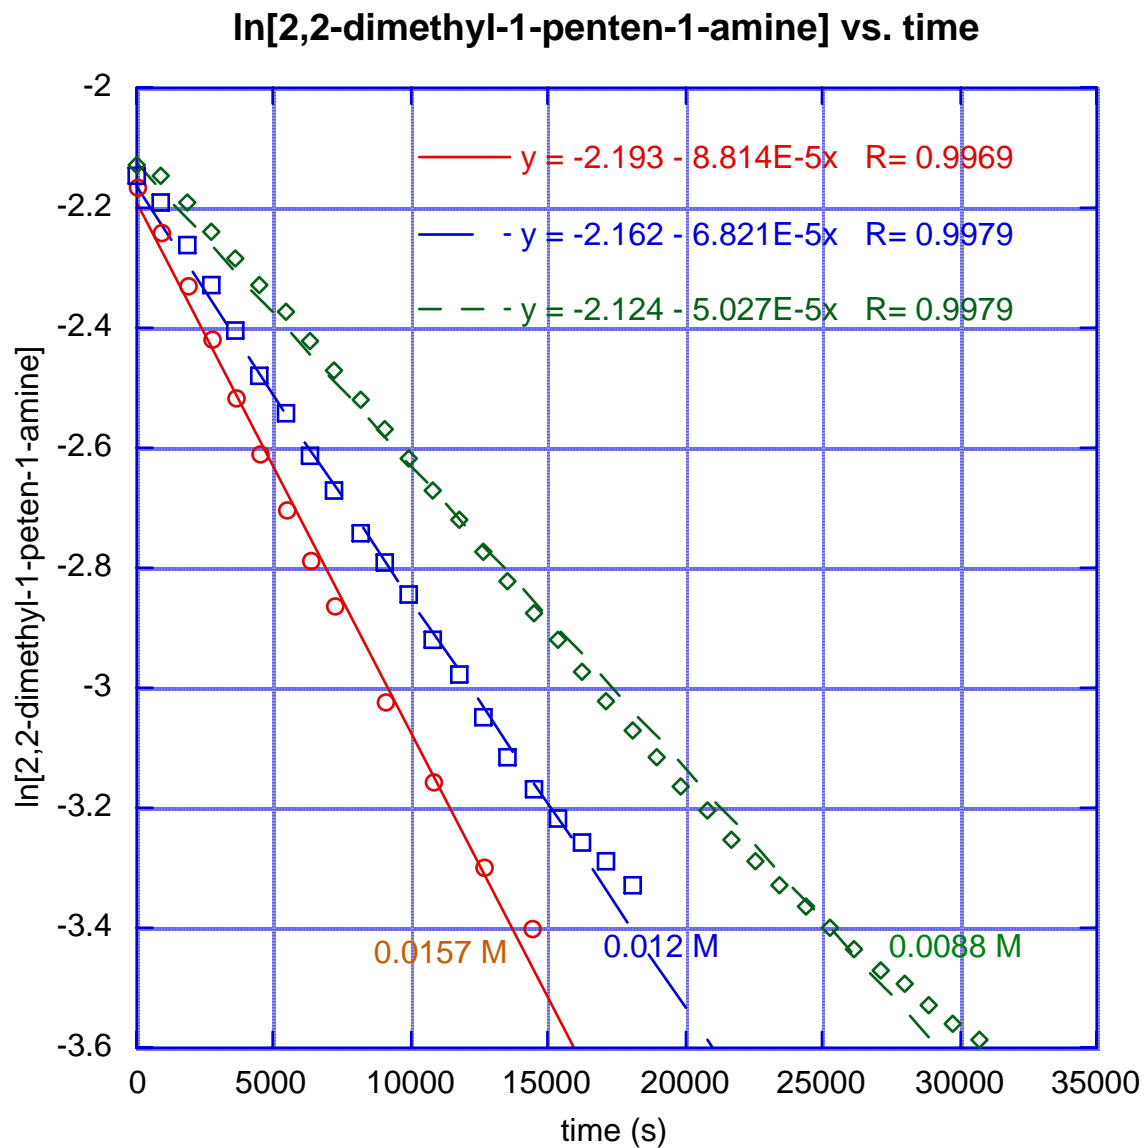

**Figure S7.** Plot of  $k_{\text{obs}}$  (from Figure S6) versus concentration of  $[(\text{PhB}(\eta^5\text{-C}_5\text{H}_4)(\text{Ox}^{\text{Me}_2})_2)\text{Zr}(\text{NMe}_2)_2]$  (**2**) for the cyclization of 2,2-dimethyl-1-penten-1-amine showing first order dependence on catalyst.

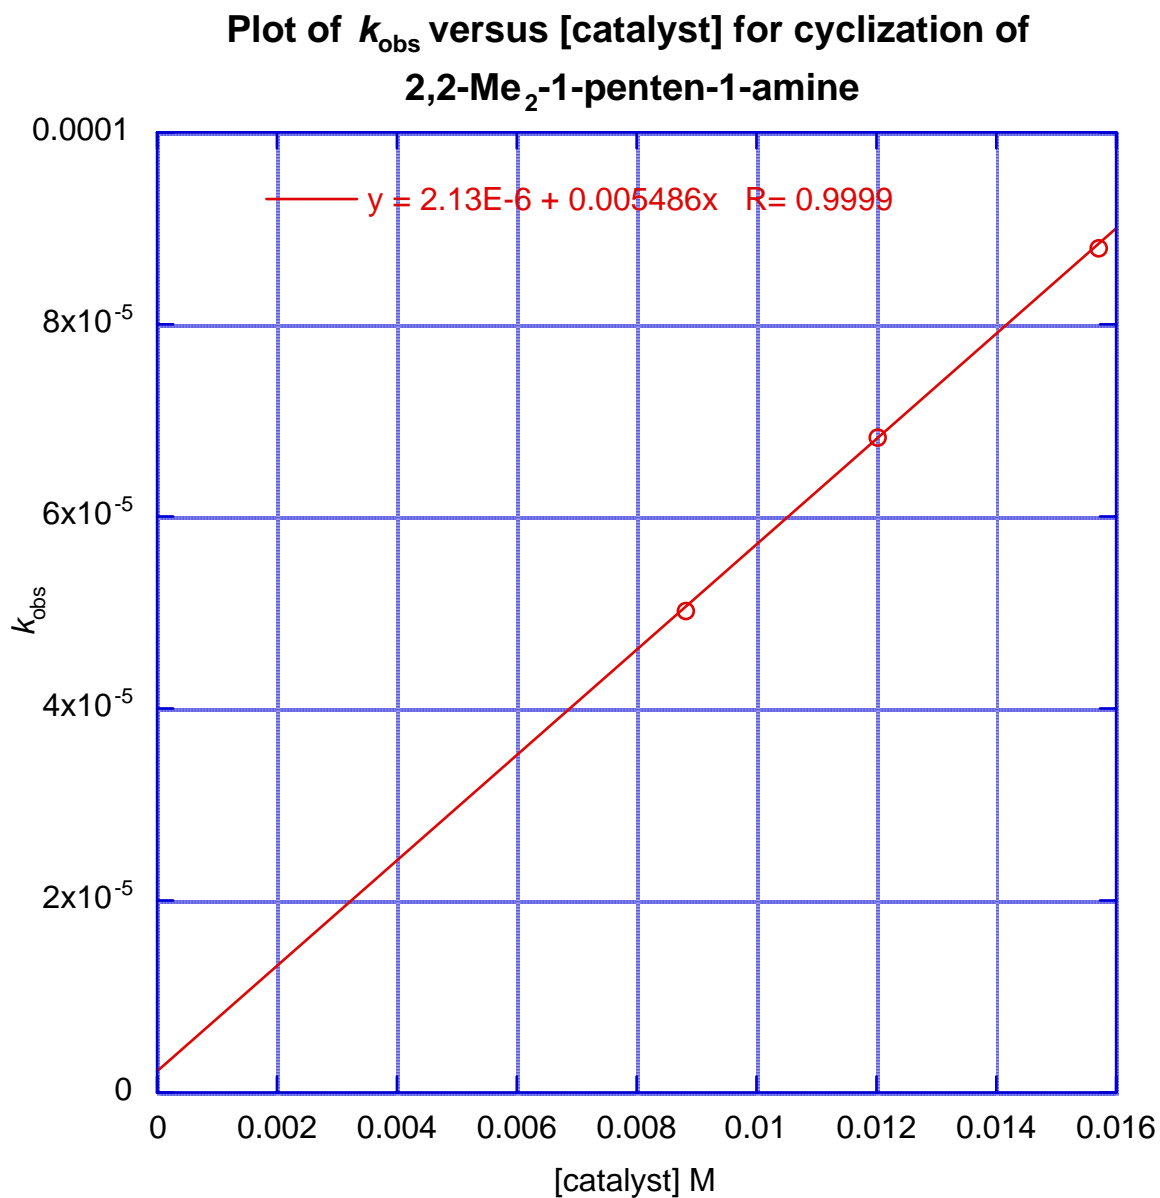

X-ray crystallography for  $\{(\text{PhB}(\eta^5\text{-C}_5\text{H}_4)(\text{Ox}^{\text{Me}_2})_2)\text{Zr}(\text{NMe}_2)_2\text{THF} (4)$ .

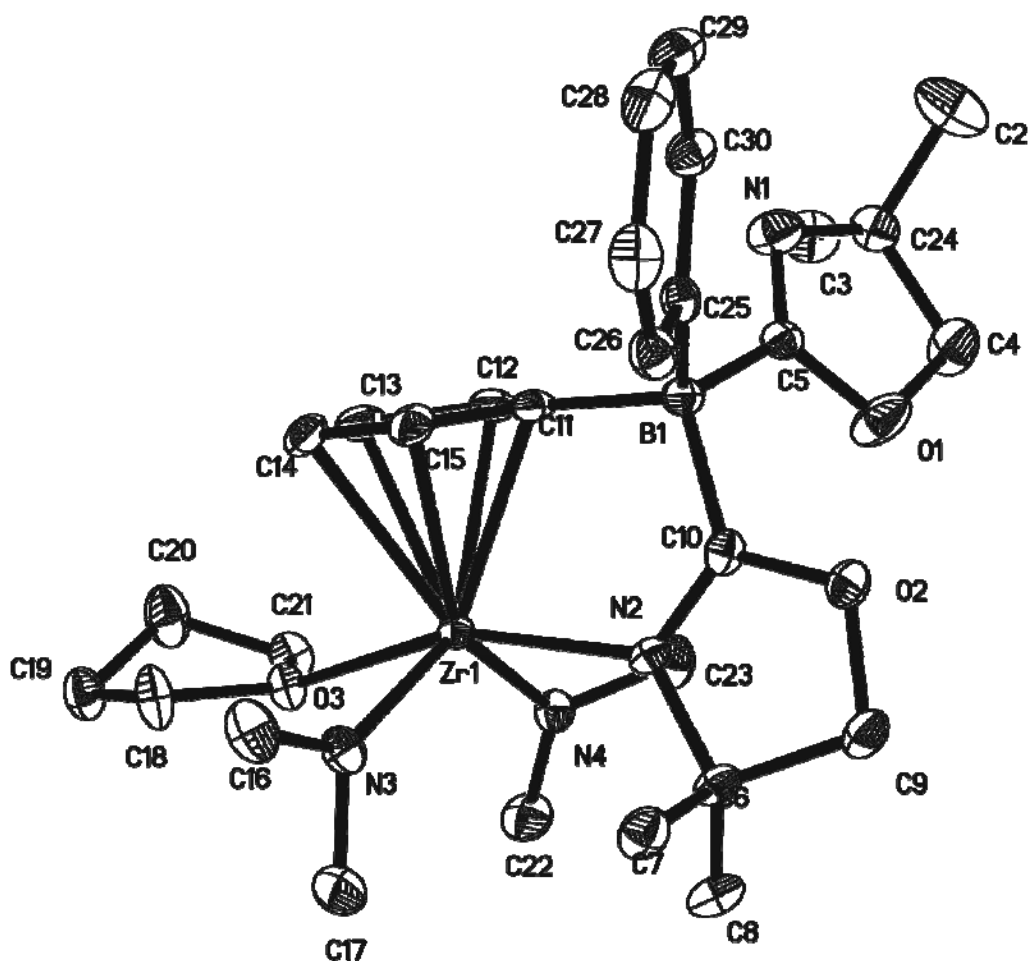

**Table S1.** Crystal data and structure refinement for  $\{(\text{PhB}(\eta^5\text{-C}_5\text{H}_4)(\text{Ox}^{\text{Me}_2})_2)\text{Zr}(\text{NMe}_2)_2\text{THF} (4)$ .

|                        |                                                            |                               |
|------------------------|------------------------------------------------------------|-------------------------------|
| Empirical formula      | $\text{C}_{29}\text{H}_{45}\text{BN}_4\text{O}_3\text{Zr}$ |                               |
| Formula weight         | 599.72                                                     |                               |
| Temperature            | 123(2) K                                                   |                               |
| Wavelength             | 0.71073 Å                                                  |                               |
| Crystal system         | Monoclinic                                                 |                               |
| Space group            | $P2_1/n$                                                   |                               |
| Unit cell dimensions   | $a = 12.7494(5)$ Å                                         | $\alpha = 90^\circ$ .         |
|                        | $b = 17.2023(7)$ Å                                         | $\beta = 93.9520(10)^\circ$ . |
|                        | $c = 13.5397(5)$ Å                                         | $\gamma = 90^\circ$ .         |
| Volume                 | $2962.5(2)$ Å <sup>3</sup>                                 |                               |
| Z                      | 4                                                          |                               |
| Density (calculated)   | 1.345 Mg/m <sup>3</sup>                                    |                               |
| Absorption coefficient | 0.407 mm <sup>-1</sup>                                     |                               |
| F(000)                 | 1264                                                       |                               |
| Crystal size           | $0.32 \times 0.26 \times 0.20$ mm <sup>3</sup>             |                               |

Supplementary Material (ESI) for Chemical Communications  
This journal is (c) The Royal Society of Chemistry 2009

|                                   |                                             |
|-----------------------------------|---------------------------------------------|
| Theta range for data collection   | 1.92 to 27.53°                              |
| Index ranges                      | -16≤h≤16, -22≤k≤22, -17≤l≤17                |
| Reflections collected             | 31553                                       |
| Independent reflections           | 6824 [R(int) = 0.0382]                      |
| Completeness to theta = 27.53°    | 99.9 %                                      |
| Absorption correction             | Semi-empirical from equivalents             |
| Max. and min. transmission        | 0.74 and 0.63                               |
| Refinement method                 | Full-matrix least-squares on F <sup>2</sup> |
| Data / restraints / parameters    | 6824 / 0 / 351                              |
| Goodness-of-fit on F <sup>2</sup> | 1.051                                       |
| Final R indices [I>2sigma(I)]     | R1 = 0.0274, wR2 = 0.0681                   |
| R indices (all data)              | R1 = 0.0357, wR2 = 0.0732                   |
| Largest diff. peak and hole       | 0.541 and -0.419 e.Å <sup>-3</sup>          |

$$R1 = \frac{\sum ||F_o| - |F_c||}{\sum |F_o|} \text{ and } wR2 = \left\{ \frac{\sum [w(F_o^2 - F_c^2)^2]}{\sum [w(F_o^2)^2]} \right\}^{1/2}$$

**Table S2.** Atomic coordinates ( $\times 10^4$ ) and equivalent isotropic displacement parameters ( $\text{\AA}^2 \times 10^3$ ) for  $\{\text{PhB}(\eta^5\text{-C}_5\text{H}_4)(\text{Ox}^{\text{Me}_2})_2\}\text{Zr}(\text{NMe}_2)_2\text{THF}$  (**4**). U(eq) is defined as one third of the trace of the orthogonalized  $U^{ij}$  tensor.

|       | x       | y       | z        | U(eq) |
|-------|---------|---------|----------|-------|
| Zr(1) | 6261(1) | 1485(1) | 7744(1)  | 13(1) |
| B(1)  | 4278(1) | 2756(1) | 8455(1)  | 16(1) |
| C(2)  | 3239(2) | 5333(1) | 7242(2)  | 42(1) |
| C(3)  | 4664(2) | 4826(1) | 6258(2)  | 34(1) |
| C(4)  | 4959(2) | 4884(1) | 8123(2)  | 32(1) |
| C(5)  | 4348(1) | 3647(1) | 8070(1)  | 17(1) |
| C(6)  | 6626(1) | 2093(1) | 10187(1) | 19(1) |
| C(7)  | 6295(2) | 1356(1) | 10710(1) | 23(1) |
| C(8)  | 7809(1) | 2116(1) | 10104(1) | 26(1) |
| C(9)  | 6228(1) | 2816(1) | 10698(1) | 22(1) |
| C(10) | 5212(1) | 2605(1) | 9299(1)  | 17(1) |
| C(11) | 4496(1) | 2145(1) | 7582(1)  | 17(1) |
| C(12) | 4983(1) | 2264(1) | 6678(1)  | 19(1) |
| C(13) | 5057(1) | 1547(1) | 6182(1)  | 24(1) |
| C(14) | 4608(1) | 970(1)  | 6764(1)  | 25(1) |
| C(15) | 4269(1) | 1338(1) | 7615(1)  | 21(1) |
| C(16) | 5714(2) | -190(1) | 8689(2)  | 28(1) |
| C(17) | 7503(2) | 222(1)  | 8738(1)  | 27(1) |
| C(18) | 6928(2) | -49(1)  | 6314(2)  | 30(1) |
| C(19) | 7374(2) | -234(1) | 5342(1)  | 29(1) |
| C(20) | 7278(2) | 544(1)  | 4808(2)  | 36(1) |
| C(21) | 7556(2) | 1117(1) | 5627(1)  | 23(1) |
| C(22) | 8656(1) | 1991(1) | 7520(2)  | 28(1) |
| C(23) | 7453(2) | 3028(1) | 7694(1)  | 26(1) |
| C(24) | 4157(1) | 4777(1) | 7238(1)  | 23(1) |
| C(25) | 3135(1) | 2553(1) | 8859(1)  | 17(1) |
| C(26) | 3003(1) | 2010(1) | 9612(1)  | 22(1) |
| C(27) | 2012(2) | 1788(1) | 9884(1)  | 25(1) |
| C(28) | 1117(1) | 2107(1) | 9416(1)  | 25(1) |
| C(29) | 1223(1) | 2649(1) | 8670(1)  | 25(1) |
| C(30) | 2215(1) | 2862(1) | 8399(1)  | 21(1) |
| N(1)  | 3794(1) | 3966(1) | 7370(1)  | 28(1) |
| N(2)  | 5999(1) | 2138(1) | 9206(1)  | 15(1) |
| N(3)  | 6420(1) | 433(1)  | 8442(1)  | 20(1) |

Supplementary Material (ESI) for Chemical Communications  
This journal is (c) The Royal Society of Chemistry 2009

|      |         |         |          |       |
|------|---------|---------|----------|-------|
| N(4) | 7555(1) | 2188(1) | 7613(1)  | 19(1) |
| O(1) | 5106(1) | 4115(1) | 8535(1)  | 37(1) |
| O(2) | 5211(1) | 2967(1) | 10188(1) | 22(1) |
| O(3) | 7153(1) | 766(1)  | 6519(1)  | 19(1) |

**Table S3.** Bond lengths [Å] for {PhB( $\eta^5$ -C<sub>5</sub>H<sub>4</sub>)(Ox<sup>Me2</sup>)<sub>2</sub>}Zr(NMe<sub>2</sub>)<sub>2</sub>THF (**4**).

|             |          |              |          |              |          |
|-------------|----------|--------------|----------|--------------|----------|
| Zr(1)-N(3)  | 2.045(1) | C(6)-C(9)    | 1.527(2) | C(18)-C(19)  | 1.504(3) |
| Zr(1)-N(4)  | 2.062(1) | C(7)-H(7A)   | 0.9800   | C(18)-H(18A) | 0.9900   |
| Zr(1)-N(2)  | 2.321(1) | C(7)-H(7B)   | 0.9800   | C(18)-H(18B) | 0.9900   |
| Zr(1)-O(3)  | 2.415(1) | C(7)-H(7C)   | 0.9800   | C(19)-C(20)  | 1.522(3) |
| Zr(1)-C(12) | 2.492(2) | C(8)-H(8A)   | 0.9800   | C(19)-H(19A) | 0.9900   |
| Zr(1)-C(11) | 2.518(2) | C(8)-H(8B)   | 0.9800   | C(19)-H(19B) | 0.9900   |
| Zr(1)-C(13) | 2.528(2) | C(8)-H(8C)   | 0.9800   | C(20)-C(21)  | 1.508(3) |
| Zr(1)-C(15) | 2.547(2) | C(9)-O(2)    | 1.451(2) | C(20)-H(20A) | 0.9900   |
| Zr(1)-C(14) | 2.569(2) | C(9)-H(9A)   | 0.9900   | C(20)-H(20B) | 0.9900   |
| B(1)-C(10)  | 1.614(2) | C(9)-H(9B)   | 0.9900   | C(21)-O(3)   | 1.473(2) |
| B(1)-C(11)  | 1.620(2) | C(10)-N(2)   | 1.298(2) | C(21)-H(21A) | 0.9900   |
| B(1)-C(5)   | 1.624(2) | C(10)-O(2)   | 1.355(2) | C(21)-H(21B) | 0.9900   |
| B(1)-C(25)  | 1.628(2) | C(11)-C(15)  | 1.420(2) | C(22)-N(4)   | 1.458(2) |
| C(2)-C(24)  | 1.512(3) | C(11)-C(12)  | 1.424(2) | C(22)-H(22A) | 0.9800   |
| C(2)-H(2A)  | 0.9800   | C(12)-C(13)  | 1.410(2) | C(22)-H(22B) | 0.9800   |
| C(2)-H(2B)  | 0.9800   | C(12)-H(12)  | 1.0000   | C(22)-H(22C) | 0.9800   |
| C(2)-H(2C)  | 0.9800   | C(13)-C(14)  | 1.413(3) | C(23)-N(4)   | 1.455(2) |
| C(3)-C(24)  | 1.519(3) | C(13)-H(13)  | 1.0000   | C(23)-H(23A) | 0.9800   |
| C(3)-H(3A)  | 0.9800   | C(14)-C(15)  | 1.409(2) | C(23)-H(23B) | 0.9800   |
| C(3)-H(3B)  | 0.9800   | C(14)-H(14)  | 1.0000   | C(23)-H(23C) | 0.9800   |
| C(3)-H(3C)  | 0.9800   | C(15)-H(15)  | 1.0000   | C(24)-N(1)   | 1.484(2) |
| C(4)-O(1)   | 1.443(2) | C(16)-N(3)   | 1.454(2) | C(25)-C(30)  | 1.395(2) |
| C(4)-C(24)  | 1.531(3) | C(16)-H(16A) | 0.9800   | C(25)-C(26)  | 1.403(2) |
| C(4)-H(4A)  | 0.9900   | C(16)-H(16B) | 0.9800   | C(26)-C(27)  | 1.394(3) |
| C(4)-H(4B)  | 0.9900   | C(16)-H(16C) | 0.9800   | C(26)-H(26)  | 0.9500   |
| C(5)-N(1)   | 1.267(2) | C(17)-N(3)   | 1.457(2) | C(27)-C(28)  | 1.380(3) |
| C(5)-O(1)   | 1.377(2) | C(17)-H(17A) | 0.9800   | C(27)-H(27)  | 0.9500   |
| C(6)-N(2)   | 1.505(2) | C(17)-H(17B) | 0.9800   | C(28)-C(29)  | 1.388(3) |
| C(6)-C(8)   | 1.520(2) | C(17)-H(17C) | 0.9800   | C(28)-H(28)  | 0.9500   |
| C(6)-C(7)   | 1.525(2) | C(18)-O(3)   | 1.455(2) | C(29)-C(30)  | 1.390(2) |

**Table S3.** Bond angles [°] for {PhB( $\eta^5$ -C<sub>5</sub>H<sub>4</sub>)(Ox<sup>Me2</sup>)<sub>2</sub>}Zr(NMe<sub>2</sub>)<sub>2</sub>THF (**4**).

|                  |           |                   |           |                   |           |
|------------------|-----------|-------------------|-----------|-------------------|-----------|
| N(3)-Zr(1)-N(4)  | 120.26(6) | C(12)-Zr(1)-C(11) | 33.03(5)  | N(3)-Zr(1)-C(14)  | 89.16(6)  |
| N(3)-Zr(1)-N(2)  | 92.84(5)  | N(3)-Zr(1)-C(13)  | 117.35(6) | N(4)-Zr(1)-C(14)  | 142.21(6) |
| N(4)-Zr(1)-N(2)  | 87.26(5)  | N(4)-Zr(1)-C(13)  | 110.29(6) | N(2)-Zr(1)-C(14)  | 116.49(5) |
| N(3)-Zr(1)-O(3)  | 80.11(5)  | N(2)-Zr(1)-C(13)  | 125.29(5) | O(3)-Zr(1)-C(14)  | 82.97(5)  |
| N(4)-Zr(1)-O(3)  | 79.87(5)  | O(3)-Zr(1)-C(13)  | 74.65(5)  | C(12)-Zr(1)-C(14) | 53.55(6)  |
| N(2)-Zr(1)-O(3)  | 159.40(4) | C(12)-Zr(1)-C(13) | 32.61(6)  | C(11)-Zr(1)-C(14) | 54.12(6)  |
| N(3)-Zr(1)-C(12) | 141.58(6) | C(11)-Zr(1)-C(13) | 54.55(5)  | C(13)-Zr(1)-C(14) | 32.17(6)  |
| N(4)-Zr(1)-C(12) | 97.48(6)  | N(3)-Zr(1)-C(15)  | 90.60(6)  | C(15)-Zr(1)-C(14) | 31.97(6)  |
| N(2)-Zr(1)-C(12) | 96.11(5)  | N(4)-Zr(1)-C(15)  | 148.43(6) | C(10)-B(1)-C(11)  | 104.9(1)  |
| O(3)-Zr(1)-C(12) | 101.42(5) | N(2)-Zr(1)-C(15)  | 84.52(5)  | C(10)-B(1)-C(5)   | 109.0(1)  |
| N(3)-Zr(1)-C(11) | 119.94(6) | O(3)-Zr(1)-C(15)  | 114.66(5) | C(11)-B(1)-C(5)   | 111.2(1)  |
| N(4)-Zr(1)-C(11) | 116.32(6) | C(12)-Zr(1)-C(15) | 53.43(6)  | C(10)-B(1)-C(25)  | 111.2(1)  |
| N(2)-Zr(1)-C(11) | 71.04(5)  | C(11)-Zr(1)-C(15) | 32.56(5)  | C(11)-B(1)-C(25)  | 108.0(1)  |
| O(3)-Zr(1)-C(11) | 129.19(5) | C(13)-Zr(1)-C(15) | 53.24(6)  | C(5)-B(1)-C(25)   | 112.4(1)  |

Supplementary Material (ESI) for Chemical Communications  
 This journal is (c) The Royal Society of Chemistry 2009

|                   |            |                     |            |                     |           |
|-------------------|------------|---------------------|------------|---------------------|-----------|
| C(24)-C(2)-H(2A)  | 109.5      | C(11)-C(12)-Zr(1)   | 74.48(9)   | C(20)-C(21)-H(21B)  | 110.8     |
| C(24)-C(2)-H(2B)  | 109.5      | C(13)-C(12)-H(12)   | 124.9      | H(21A)-C(21)-H(21B) | 108.8     |
| H(2A)-C(2)-H(2B)  | 109.5      | C(11)-C(12)-H(12)   | 124.9      | N(4)-C(22)-H(22A)   | 109.5     |
| C(24)-C(2)-H(2C)  | 109.5      | Zr(1)-C(12)-H(12)   | 124.9      | N(4)-C(22)-H(22B)   | 109.5     |
| H(2A)-C(2)-H(2C)  | 109.5      | C(12)-C(13)-C(14)   | 107.83(15) | H(22A)-C(22)-H(22B) | 109.5     |
| H(2B)-C(2)-H(2C)  | 109.5      | C(12)-C(13)-Zr(1)   | 72.28(9)   | N(4)-C(22)-H(22C)   | 109.5     |
| C(24)-C(3)-H(3A)  | 109.5      | C(14)-C(13)-Zr(1)   | 75.5(1)    | H(22A)-C(22)-H(22C) | 109.5     |
| C(24)-C(3)-H(3B)  | 109.5      | C(12)-C(13)-H(13)   | 125.7      | H(22B)-C(22)-H(22C) | 109.5     |
| H(3A)-C(3)-H(3B)  | 109.5      | C(14)-C(13)-H(13)   | 125.7      | N(4)-C(23)-H(23A)   | 109.5     |
| C(24)-C(3)-H(3C)  | 109.5      | Zr(1)-C(13)-H(13)   | 125.7      | N(4)-C(23)-H(23B)   | 109.5     |
| H(3A)-C(3)-H(3C)  | 109.5      | C(15)-C(14)-C(13)   | 107.4(2)   | H(23A)-C(23)-H(23B) | 109.5     |
| H(3B)-C(3)-H(3C)  | 109.5      | C(15)-C(14)-Zr(1)   | 73.15(9)   | N(4)-C(23)-H(23C)   | 109.5     |
| O(1)-C(4)-C(24)   | 104.7(2)   | C(13)-C(14)-Zr(1)   | 72.33(10)  | H(23A)-C(23)-H(23C) | 109.5     |
| O(1)-C(4)-H(4A)   | 110.8      | C(15)-C(14)-H(14)   | 126.1      | H(23B)-C(23)-H(23C) | 109.5     |
| C(24)-C(4)-H(4A)  | 110.8      | C(13)-C(14)-H(14)   | 126.1      | N(1)-C(24)-C(2)     | 110.3(2)  |
| O(1)-C(4)-H(4B)   | 110.8      | Zr(1)-C(14)-H(14)   | 126.1      | N(1)-C(24)-C(3)     | 108.2(2)  |
| C(24)-C(4)-H(4B)  | 110.8      | C(14)-C(15)-C(11)   | 109.79(16) | C(2)-C(24)-C(3)     | 110.1(2)  |
| H(4A)-C(4)-H(4B)  | 108.9      | C(14)-C(15)-Zr(1)   | 74.88(10)  | N(1)-C(24)-C(4)     | 102.5(1)  |
| N(1)-C(5)-O(1)    | 115.22(15) | C(11)-C(15)-Zr(1)   | 72.59(9)   | C(2)-C(24)-C(4)     | 113.3(2)  |
| N(1)-C(5)-B(1)    | 127.51(15) | C(14)-C(15)-H(15)   | 124.9      | C(3)-C(24)-C(4)     | 112.1(2)  |
| O(1)-C(5)-B(1)    | 117.25(14) | C(11)-C(15)-H(15)   | 124.9      | C(30)-C(25)-C(26)   | 116.0(2)  |
| N(2)-C(6)-C(8)    | 113.75(14) | Zr(1)-C(15)-H(15)   | 124.9      | C(30)-C(25)-B(1)    | 120.9(2)  |
| N(2)-C(6)-C(7)    | 107.83(13) | N(3)-C(16)-H(16A)   | 109.5      | C(26)-C(25)-B(1)    | 122.8(2)  |
| C(8)-C(6)-C(7)    | 111.34(15) | N(3)-C(16)-H(16B)   | 109.5      | C(27)-C(26)-C(25)   | 122.1(2)  |
| N(2)-C(6)-C(9)    | 100.68(13) | H(16A)-C(16)-H(16B) | 109.5      | C(27)-C(26)-H(26)   | 119.0     |
| C(8)-C(6)-C(9)    | 111.98(15) | N(3)-C(16)-H(16C)   | 109.5      | C(25)-C(26)-H(26)   | 119.0     |
| C(7)-C(6)-C(9)    | 110.75(14) | H(16A)-C(16)-H(16C) | 109.5      | C(28)-C(27)-C(26)   | 120.4(2)  |
| C(6)-C(7)-H(7A)   | 109.5      | H(16B)-C(16)-H(16C) | 109.5      | C(28)-C(27)-H(27)   | 119.8     |
| C(6)-C(7)-H(7B)   | 109.5      | N(3)-C(17)-H(17A)   | 109.5      | C(26)-C(27)-H(27)   | 119.8     |
| H(7A)-C(7)-H(7B)  | 109.5      | N(3)-C(17)-H(17B)   | 109.5      | C(27)-C(28)-C(29)   | 118.8(2)  |
| C(6)-C(7)-H(7C)   | 109.5      | H(17A)-C(17)-H(17B) | 109.5      | C(27)-C(28)-H(28)   | 120.6     |
| H(7A)-C(7)-H(7C)  | 109.5      | N(3)-C(17)-H(17C)   | 109.5      | C(29)-C(28)-H(28)   | 120.6     |
| H(7B)-C(7)-H(7C)  | 109.5      | H(17A)-C(17)-H(17C) | 109.5      | C(28)-C(29)-C(30)   | 120.4(2)  |
| C(6)-C(8)-H(8A)   | 109.5      | H(17B)-C(17)-H(17C) | 109.5      | C(28)-C(29)-H(29)   | 119.8     |
| C(6)-C(8)-H(8B)   | 109.5      | O(3)-C(18)-C(19)    | 106.8(2)   | C(30)-C(29)-H(29)   | 119.8     |
| H(8A)-C(8)-H(8B)  | 109.5      | O(3)-C(18)-H(18A)   | 110.4      | C(29)-C(30)-C(25)   | 122.3(2)  |
| C(6)-C(8)-H(8C)   | 109.5      | C(19)-C(18)-H(18A)  | 110.4      | C(29)-C(30)-H(30)   | 118.8     |
| H(8A)-C(8)-H(8C)  | 109.5      | O(3)-C(18)-H(18B)   | 110.4      | C(25)-C(30)-H(30)   | 118.8     |
| H(8B)-C(8)-H(8C)  | 109.5      | C(19)-C(18)-H(18B)  | 110.4      | C(5)-N(1)-C(24)     | 109.5(2)  |
| O(2)-C(9)-C(6)    | 104.1(1)   | H(18A)-C(18)-H(18B) | 108.6      | C(10)-N(2)-C(6)     | 108.3(1)  |
| O(2)-C(9)-H(9A)   | 110.9      | C(18)-C(19)-C(20)   | 101.9(2)   | C(10)-N(2)-Zr(1)    | 122.7(1)  |
| C(6)-C(9)-H(9A)   | 110.9      | C(18)-C(19)-H(19A)  | 111.4      | C(6)-N(2)-Zr(1)     | 129.0(1)  |
| O(2)-C(9)-H(9B)   | 110.9      | C(20)-C(19)-H(19A)  | 111.4      | C(16)-N(3)-C(17)    | 110.1(1)  |
| C(6)-C(9)-H(9B)   | 110.9      | C(18)-C(19)-H(19B)  | 111.4      | C(16)-N(3)-Zr(1)    | 135.7(1)  |
| H(9A)-C(9)-H(9B)  | 109.0      | C(20)-C(19)-H(19B)  | 111.4      | C(17)-N(3)-Zr(1)    | 114.2(1)  |
| N(2)-C(10)-O(2)   | 114.8(1)   | H(19A)-C(19)-H(19B) | 109.2      | C(23)-N(4)-C(22)    | 109.2(1)  |
| N(2)-C(10)-B(1)   | 124.6(1)   | C(21)-C(20)-C(19)   | 102.7(2)   | C(23)-N(4)-Zr(1)    | 120.0(1)  |
| O(2)-C(10)-B(1)   | 120.6(1)   | C(21)-C(20)-H(20A)  | 111.2      | C(22)-N(4)-Zr(1)    | 130.7(1)  |
| C(15)-C(11)-C(12) | 105.6(2)   | C(19)-C(20)-H(20A)  | 111.2      | C(5)-O(1)-C(4)      | 106.9(1)  |
| C(15)-C(11)-B(1)  | 124.4(2)   | C(21)-C(20)-H(20B)  | 111.2      | C(10)-O(2)-C(9)     | 106.6(1)  |
| C(12)-C(11)-B(1)  | 129.9(2)   | C(19)-C(20)-H(20B)  | 111.2      | C(18)-O(3)-C(21)    | 108.3(1)  |
| C(15)-C(11)-Zr(1) | 74.85(9)   | H(20A)-C(20)-H(20B) | 109.1      | C(18)-O(3)-Zr(1)    | 121.90(1) |
| C(12)-C(11)-Zr(1) | 72.49(9)   | O(3)-C(21)-C(20)    | 104.9(1)   | C(21)-O(3)-Zr(1)    | 124.08(9) |
| B(1)-C(11)-Zr(1)  | 115.2(1)   | O(3)-C(21)-H(21A)   | 110.8      |                     |           |
| C(13)-C(12)-C(11) | 109.4(2)   | C(20)-C(21)-H(21A)  | 110.8      |                     |           |
| C(13)-C(12)-Zr(1) | 75.1(1)    | O(3)-C(21)-H(21B)   | 110.8      |                     |           |



**Table S5.** Anisotropic displacement parameters ( $\text{\AA}^2 \times 10^3$ ) for  $\{\text{PhB}(\eta^5\text{-C}_5\text{H}_4)(\text{Ox}^{\text{Me}_2})_2\}\text{Zr}(\text{NMe}_2)_2\text{THF}$  (**4**). The anisotropic displacement factor exponent takes the form:  $-2\pi^2 [h^2 a^{*2} U^{11} + \dots + 2 h k a^* b^* U^{12}]$

|       | U <sup>11</sup> | U <sup>22</sup> | U <sup>33</sup> | U <sup>23</sup> | U <sup>13</sup> | U <sup>12</sup> |
|-------|-----------------|-----------------|-----------------|-----------------|-----------------|-----------------|
| Zr(1) | 12(1)           | 14(1)           | 14(1)           | 1(1)            | 1(1)            | 0(1)            |
| B(1)  | 15(1)           | 19(1)           | 14(1)           | 0(1)            | 1(1)            | 2(1)            |
| C(2)  | 42(1)           | 45(1)           | 41(1)           | 19(1)           | 17(1)           | 16(1)           |
| C(3)  | 32(1)           | 41(1)           | 29(1)           | 6(1)            | 8(1)            | 0(1)            |
| C(4)  | 45(1)           | 21(1)           | 31(1)           | 5(1)            | -5(1)           | -8(1)           |
| C(5)  | 13(1)           | 23(1)           | 16(1)           | -2(1)           | 4(1)            | 2(1)            |
| C(6)  | 20(1)           | 22(1)           | 13(1)           | 2(1)            | -3(1)           | -3(1)           |
| C(7)  | 30(1)           | 23(1)           | 17(1)           | 3(1)            | -1(1)           | -4(1)           |
| C(8)  | 20(1)           | 36(1)           | 21(1)           | 2(1)            | -5(1)           | -4(1)           |
| C(9)  | 27(1)           | 23(1)           | 16(1)           | -1(1)           | -3(1)           | -4(1)           |
| C(10) | 20(1)           | 17(1)           | 13(1)           | 0(1)            | 3(1)            | -3(1)           |
| C(11) | 11(1)           | 24(1)           | 15(1)           | 0(1)            | -1(1)           | 3(1)            |
| C(12) | 17(1)           | 27(1)           | 13(1)           | 1(1)            | -1(1)           | 8(1)            |
| C(13) | 20(1)           | 38(1)           | 14(1)           | -5(1)           | -4(1)           | 8(1)            |
| C(14) | 17(1)           | 30(1)           | 28(1)           | -12(1)          | -4(1)           | -1(1)           |
| C(15) | 12(1)           | 26(1)           | 24(1)           | -5(1)           | 1(1)            | -2(1)           |
| C(16) | 34(1)           | 20(1)           | 31(1)           | 5(1)            | 12(1)           | -2(1)           |
| C(17) | 28(1)           | 24(1)           | 29(1)           | 5(1)            | 2(1)            | 3(1)            |
| C(18) | 44(1)           | 15(1)           | 32(1)           | -4(1)           | 13(1)           | -3(1)           |
| C(19) | 37(1)           | 23(1)           | 27(1)           | -6(1)           | 5(1)            | 3(1)            |
| C(20) | 55(1)           | 28(1)           | 25(1)           | -3(1)           | 11(1)           | 1(1)            |
| C(21) | 27(1)           | 22(1)           | 20(1)           | 2(1)            | 10(1)           | 0(1)            |
| C(22) | 18(1)           | 32(1)           | 34(1)           | 0(1)            | 3(1)            | -6(1)           |
| C(23) | 36(1)           | 20(1)           | 23(1)           | 1(1)            | 4(1)            | -6(1)           |
| C(24) | 24(1)           | 22(1)           | 25(1)           | 6(1)            | 4(1)            | 0(1)            |
| C(25) | 20(1)           | 18(1)           | 15(1)           | -3(1)           | 4(1)            | 1(1)            |
| C(26) | 24(1)           | 22(1)           | 20(1)           | -2(1)           | 3(1)            | 1(1)            |
| C(27) | 34(1)           | 22(1)           | 20(1)           | 1(1)            | 8(1)            | -4(1)           |
| C(28) | 23(1)           | 30(1)           | 23(1)           | -7(1)           | 8(1)            | -8(1)           |
| C(29) | 20(1)           | 32(1)           | 22(1)           | -3(1)           | 0(1)            | -2(1)           |
| C(30) | 21(1)           | 26(1)           | 15(1)           | 0(1)            | 1(1)            | -2(1)           |
| N(1)  | 26(1)           | 26(1)           | 31(1)           | 10(1)           | -5(1)           | -4(1)           |
| N(2)  | 15(1)           | 18(1)           | 13(1)           | 2(1)            | -1(1)           | -2(1)           |
| N(3)  | 23(1)           | 17(1)           | 21(1)           | 3(1)            | 5(1)            | 1(1)            |
| N(4)  | 18(1)           | 18(1)           | 21(1)           | 0(1)            | 3(1)            | -4(1)           |
| O(1)  | 46(1)           | 24(1)           | 38(1)           | 10(1)           | -21(1)          | -12(1)          |
| O(2)  | 27(1)           | 25(1)           | 13(1)           | -4(1)           | 0(1)            | 3(1)            |
| O(3)  | 23(1)           | 15(1)           | 19(1)           | 0(1)            | 7(1)            | 0(1)            |

**Table S6.** Hydrogen coordinates ( $\times 10^4$ ) and isotropic displacement parameters ( $\text{\AA}^2 \times 10^3$ ) for  $\{\text{PhB}(\eta^5\text{-C}_5\text{H}_4)(\text{Ox}^{\text{Me}_2})_2\}\text{Zr}(\text{NMe}_2)_2\text{THF}$  (**4**).

|       | x    | y    | z    | U(eq) |
|-------|------|------|------|-------|
| H(2A) | 2731 | 5211 | 6688 | 63    |
| H(2B) | 3493 | 5867 | 7174 | 63    |
| H(2C) | 2900 | 5282 | 7867 | 63    |
| H(3A) | 5265 | 4470 | 6267 | 51    |
| H(3B) | 4906 | 5358 | 6155 | 51    |
| H(3C) | 4149 | 4680 | 5719 | 51    |
| H(4A) | 5630 | 5093 | 7906 | 39    |
| H(4B) | 4687 | 5244 | 8615 | 39    |

Supplementary Material (ESI) for Chemical Communications  
This journal is (c) The Royal Society of Chemistry 2009

|        |      |      |       |    |
|--------|------|------|-------|----|
| H(7A)  | 5558 | 1403 | 10868 | 35 |
| H(7B)  | 6740 | 1286 | 11323 | 35 |
| H(7C)  | 6373 | 907  | 10276 | 35 |
| H(8A)  | 8027 | 1657 | 9742  | 39 |
| H(8B)  | 8166 | 2119 | 10768 | 39 |
| H(8C)  | 7995 | 2587 | 9748  | 39 |
| H(9A)  | 6158 | 2717 | 11411 | 27 |
| H(9B)  | 6711 | 3260 | 10628 | 27 |
| H(12)  | 5133 | 2783 | 6387  | 23 |
| H(13)  | 5274 | 1476 | 5492  | 29 |
| H(14)  | 4471 | 417  | 6566  | 30 |
| H(15)  | 3851 | 1082 | 8123  | 25 |
| H(16A) | 5888 | -663 | 8332  | 42 |
| H(16B) | 4987 | -39  | 8499  | 42 |
| H(16C) | 5790 | -288 | 9404  | 42 |
| H(17A) | 7581 | 154  | 9458  | 41 |
| H(17B) | 7975 | 635  | 8543  | 41 |
| H(17C) | 7681 | -265 | 8413  | 41 |
| H(18A) | 6160 | -142 | 6272  | 36 |
| H(18B) | 7259 | -381 | 6847  | 36 |
| H(19A) | 6959 | -642 | 4978  | 34 |
| H(19B) | 8116 | -404 | 5437  | 34 |
| H(20A) | 7776 | 579  | 4280  | 43 |
| H(20B) | 6554 | 629  | 4516  | 43 |
| H(21A) | 8326 | 1193 | 5715  | 27 |
| H(21B) | 7217 | 1626 | 5481  | 27 |
| H(22A) | 8907 | 2254 | 6939  | 43 |
| H(22B) | 8725 | 1427 | 7442  | 43 |
| H(22C) | 9074 | 2160 | 8115  | 43 |
| H(23A) | 7891 | 3212 | 8270  | 40 |
| H(23B) | 6717 | 3162 | 7774  | 40 |
| H(23C) | 7683 | 3274 | 7093  | 40 |
| H(26)  | 3609 | 1786 | 9948  | 26 |
| H(27)  | 1952 | 1414 | 10394 | 30 |
| H(28)  | 440  | 1958 | 9602  | 30 |
| H(29)  | 615  | 2876 | 8344  | 30 |
| H(30)  | 2268 | 3230 | 7882  | 25 |

---
